# Supplementary material for: 13C relaxation experiments for aromatic side chains employing longitudinal- and transverse-relaxation optimized NMR spectroscopy
Source: PubMed Central journal article supplement (PMC3405241; doi:10.1007/s10858-012-9650-5), 2012-07-03
Supplement: 10858_2012_9650_MOESM1_ESM.pdf [file 10858_2012_9650_MOESM1_ESM.pdf]

## Supplementary Information

### **<sup>13</sup>C relaxation experiments for aromatic side chains employing longitudinal- and transverse-relaxation optimized NMR spectroscopy**

**Ulrich Weininger, Carl Diehl, Mikael Akke\***

Department of Biophysical Chemistry, Center for Molecular Protein Science, Lund  
University, P.O. Box 124, SE-22100 Lund, Sweden

\*Correspondence should be addressed to

Mikael Akke

phone: +46-46-2228247

mobile: +46-76-8585708

e-mail: [mikael.akke@bpc.lu.se](mailto:mikael.akke@bpc.lu.se)

Fig. S1

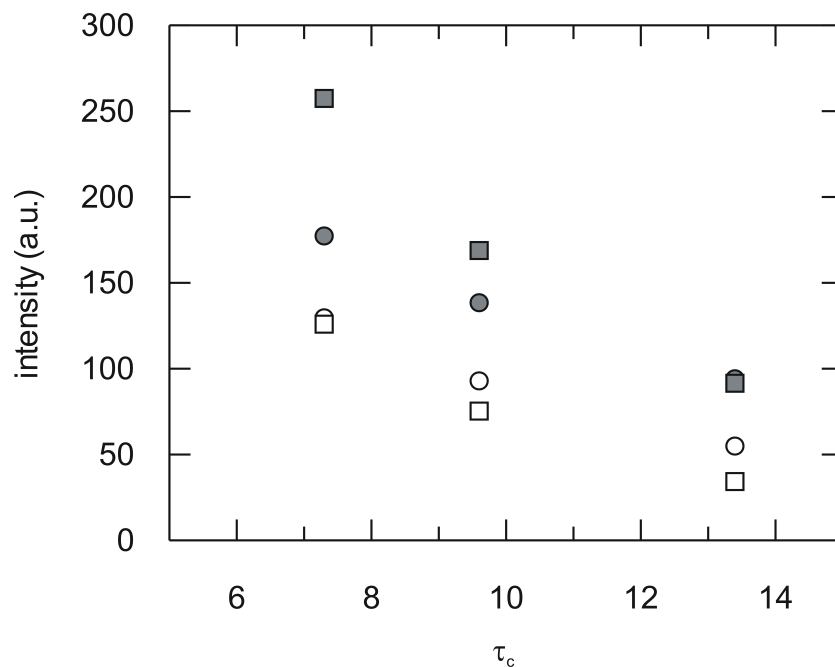

Figure S1: Representative example of cross-peak intensity in  $^1\text{H}$ - $^{13}\text{C}$  PEP-HSQC (squares) or  $^1\text{H}$ - $^{13}\text{C}$  TROSY (circles) experiments acquired with different rotational correlation times ( $\tau_c$ ) by varying the temperature between 5–28 °C. Open symbols represent experiments employing constant-time (17.6 ms)  $t_1$  evolution, while filled symbols represent non-constant time experiments. The rotational correlation time was determined at 28 °C based on  $^{15}\text{N}$  relaxation experiments [Diehl et al., (2010) *J. Am. Chem. Soc.* 132, 14577–14589], and extrapolated to the lower temperatures using the Stokes-Einstein relationship.

Table S1

Protonation levels for different positions in aromatic side chains in Gal3C expressed in 60% D<sub>2</sub>O + 40% H<sub>2</sub>O.

| Amino acid | position | $I_D/I_H$ (%) | $p_{\text{solvent}}$ (%) |
|------------|----------|---------------|--------------------------|
| Phe        | D*       | 80            | 33                       |
|            | E*       | 55            | 75                       |
| Tyr        | D*       | 70            | 50                       |
|            | E*       | 50            | 83                       |
| His        | D2       | 55            | 75                       |
|            | E1       | 80            | 33                       |
| Trp        | D1       | 80            | 33                       |
|            | E3       | 100           | 0                        |
|            | Z3       | 60            | 66                       |
|            | Z2       | 70            | 50                       |

Intensities were compared in <sup>1</sup>H-<sup>13</sup>C HSQC spectra recorded on Gal3C expressed in <sup>15</sup>N NH<sub>4</sub>Cl and 1-<sup>13</sup>C<sub>1</sub>-glucose or 2-<sup>13</sup>C<sub>1</sub>-glucose dissolved in either 100% H<sub>2</sub>O or 60% D<sub>2</sub>O + 40% H<sub>2</sub>O. The relative intensities of the two samples were calibrated based on the intensities in the corresponding <sup>1</sup>H-<sup>15</sup>N HSQC spectra. The percentage of aromatic hydrogens exchanged for solvent hydrogens was calculated as

$$p_{\text{solvent}} = \frac{I_H - I_D}{0.6I_H},$$

where  $I_H$  and  $I_D$  are the intensities in the samples expressed in 100% H<sub>2</sub>O and 60% D<sub>2</sub>O + 40% H<sub>2</sub>O, respectively.
